# Supplementary material
Source: PubMed Central journal article supplement (PMC3864306)
Supplement: 1313654110_sapp.pdf [file 1313654110_sapp.pdf]

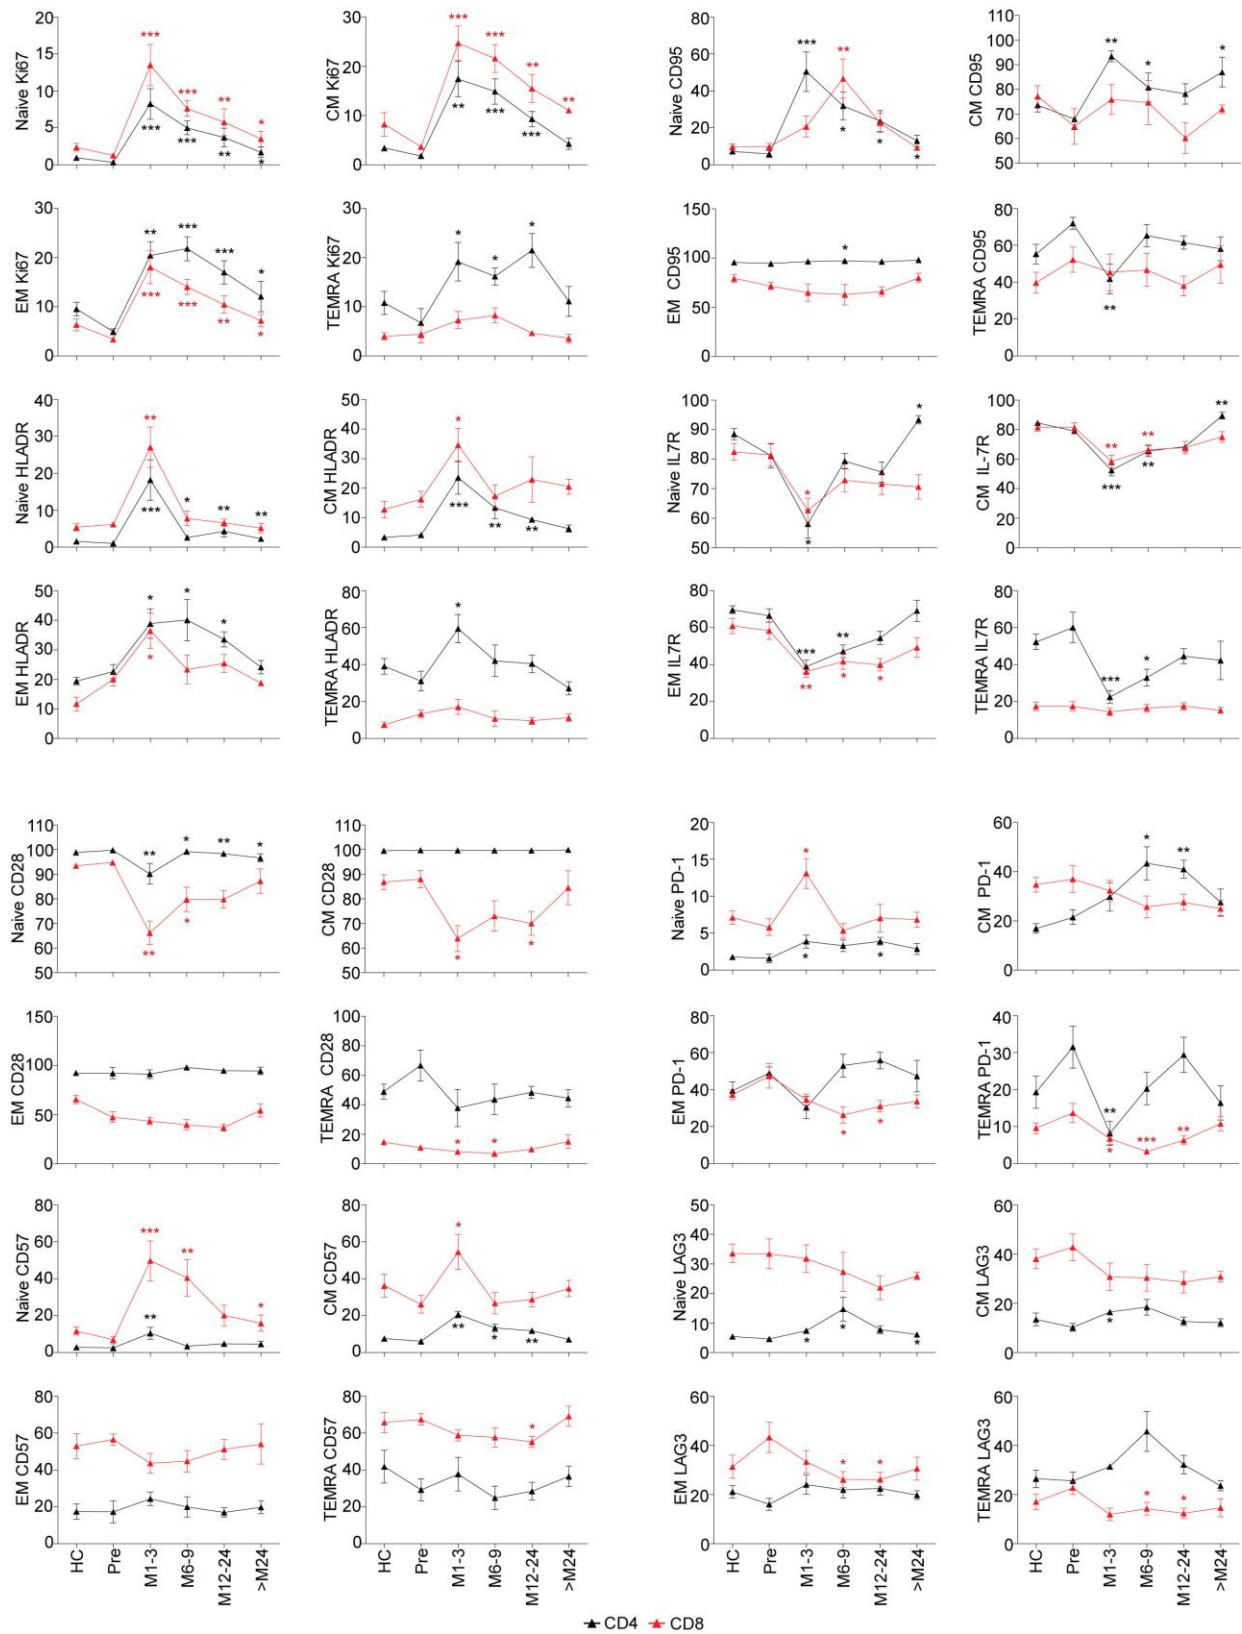

**Supplementary Figure 1** Cross-sectional analysis of CD4 and CD8 subsets from 86 RRMS patients pre and post-alemtuzumab and from 29 healthy controls (HC). Graphs show mean percent of: Naive [CD45RA+CCR7+], central memory (CM) [CD45RA-CCR7+], effector memory (EM) [CD45RA-CCR7-] and T effector memory RA (TEMRA) [CD45RA+CCR7-] cells expressing a given marker +/- s.e.m. \*P<0.05, \*\* P<0.01, \*\*\*P<0.001.

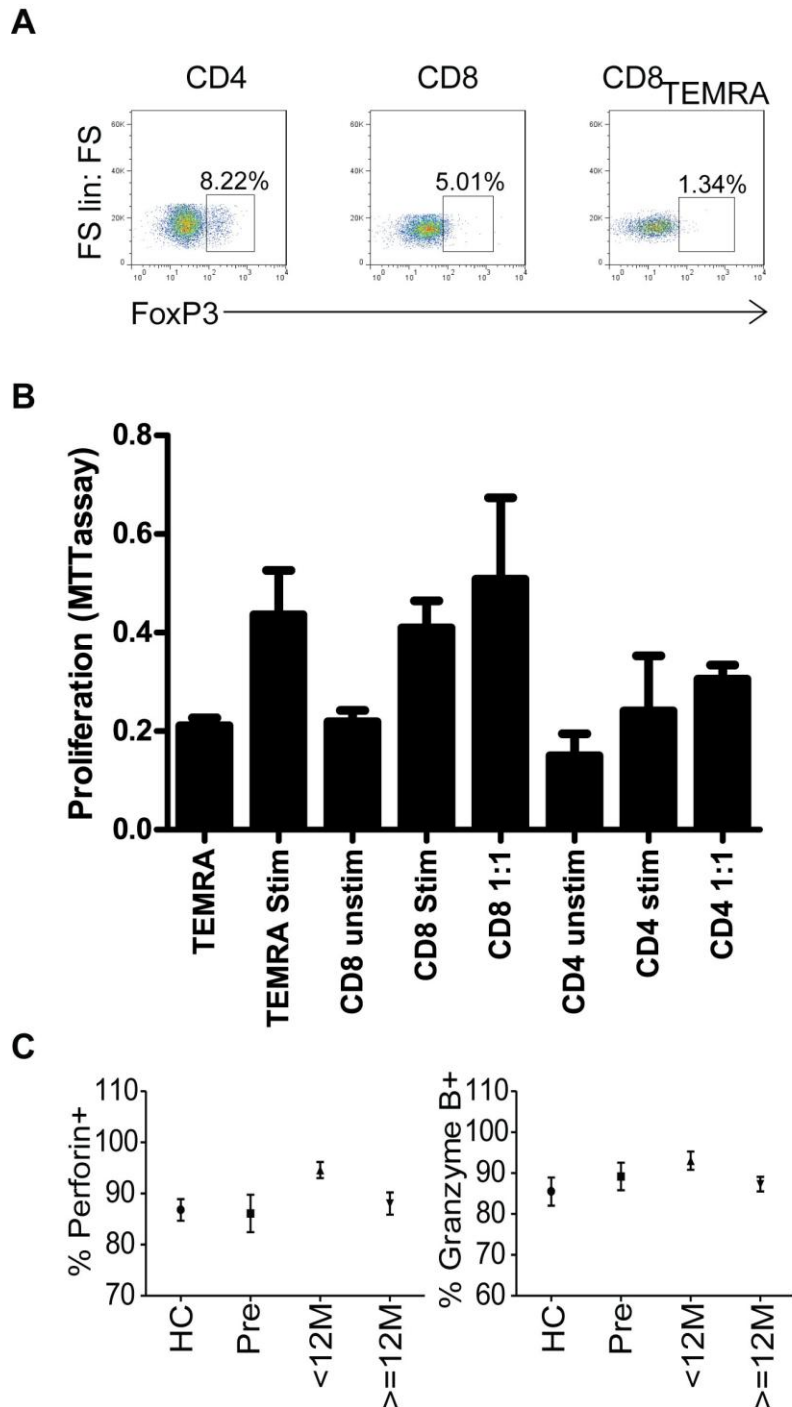

**Supplementary Figure 2** CD8<sup>TEMRA</sup> post-alemtuzumab do not express high FoxP3, do not suppress T cell proliferation but do contain cytotoxic granules. **(A)** Representative flow plots showing FoxP3 expression in CD4, CD8 and CD8<sup>TEMRA</sup> subpopulations **(B)** CD4 and CD8 effector populations were cultured with and without CD3/28 bead stimulation, with and without CD8<sup>TEMRA</sup> (ratio 1:1). Graph shows mean proliferation at 72 hours +/-95% confidence interval. **(C)** Percentage of CD8<sup>TEMRA</sup> containing perforin and granzyme B, as determined by intracellular FACS from 7 healthy controls (HC) and 20 RRMS patients pre and post-alemtuzumab. Data are mean values +/- s.e.m.

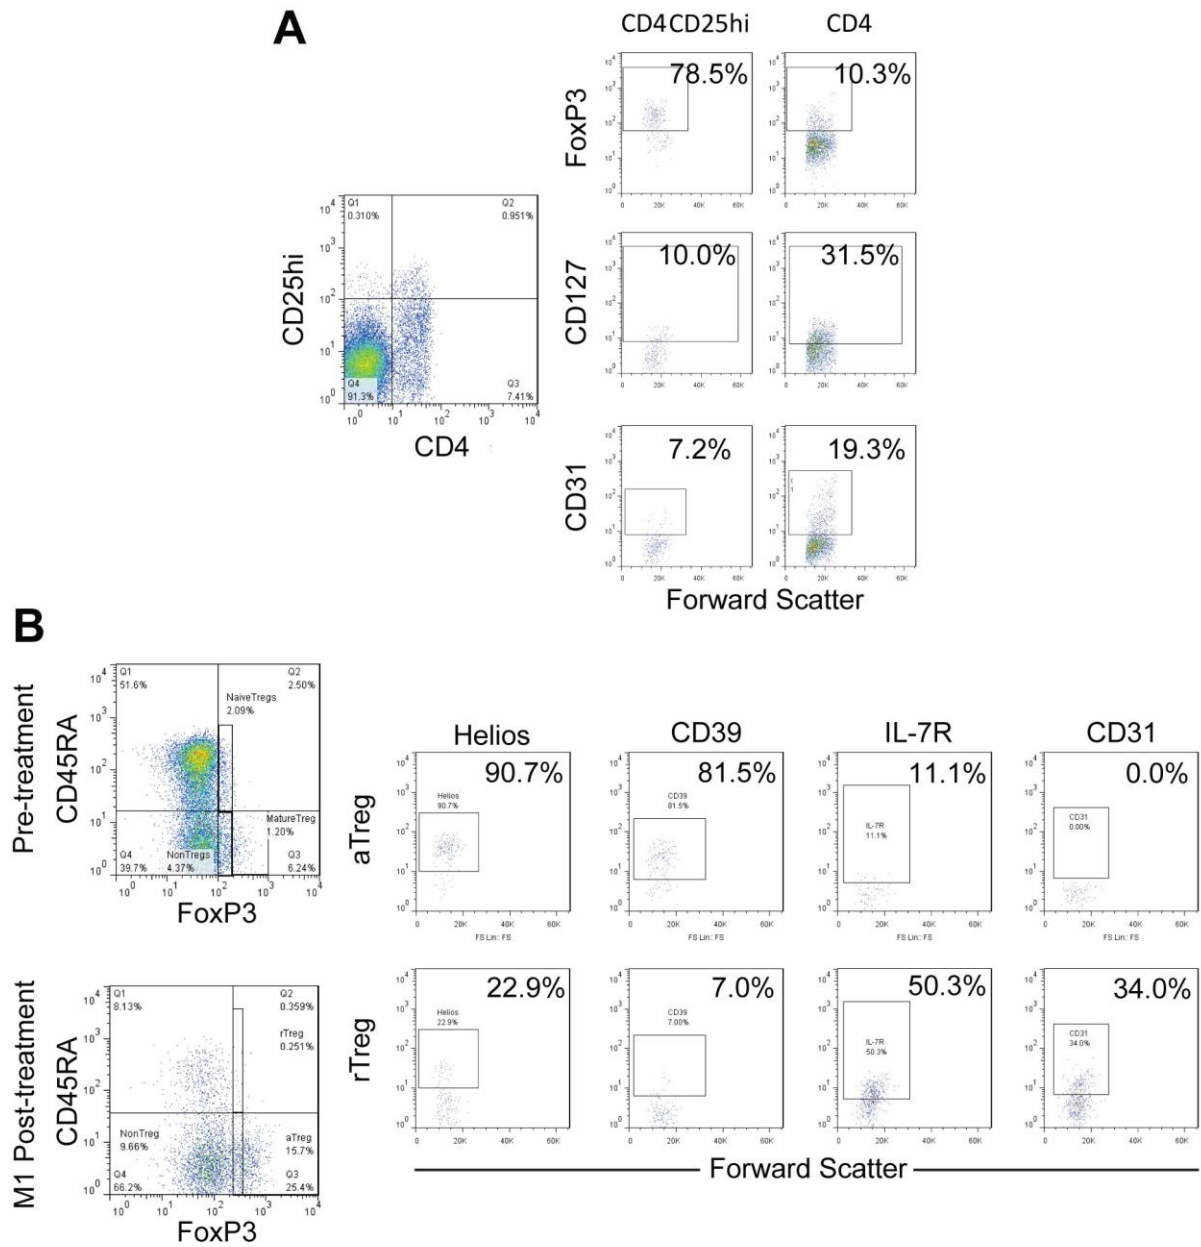

**Supplementary Figure 3** Mature aTregs are expanded after alemtuzumab. **(A)** Representative Facs plots showing CD4+CD25hi Tregs, which are increased relative to other CD4 populations after alemtuzumab, express high FoxP3 and low CD127 (IL7R) and CD31 relative to other CD4 populations. **(B)** Representative Facs plots showing Helios, CD39, CD127 (IL7R) and CD31 expression in the aTreg vs. rTreg subpopulations.

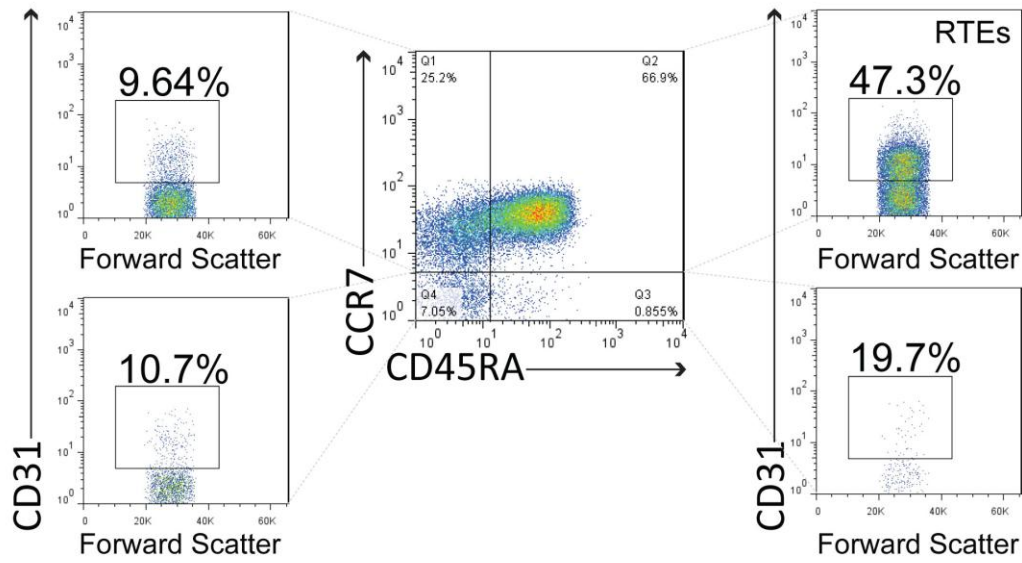

**Supplementary Figure 4** Recent thymic emigrants are defined as CD4naive (CD4+CD45RA+CCR7+) cells that co-express CD31. CD31 expression is shown for all CD4 subpopulations.

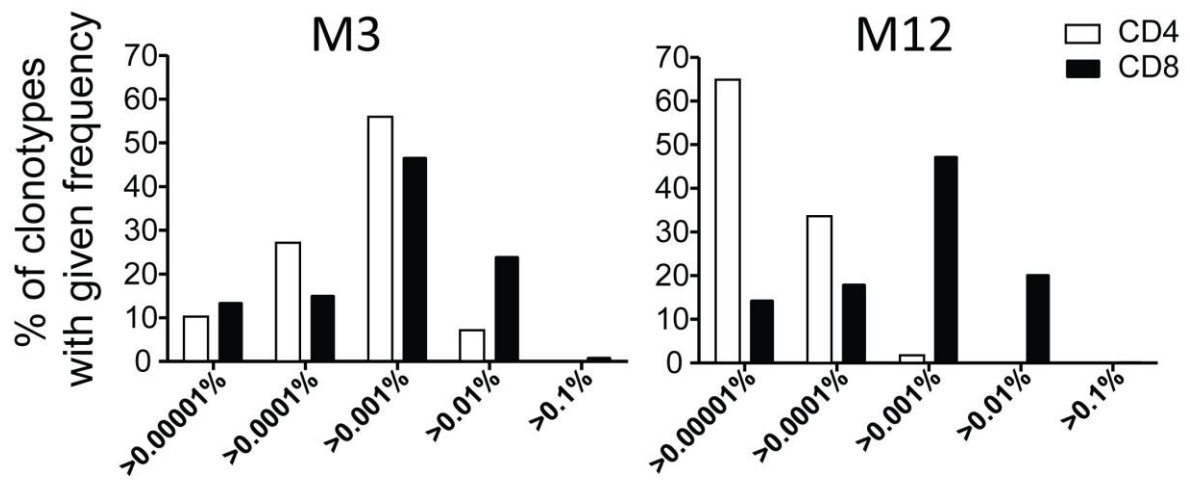

**Supplementary Figure 5** T cell clonality is reduced after alemtuzumab. TCR sequencing of CD4 and CD8 separated cells from one patient 3 months after alemtuzumab, and from a second patient 12 months post-treatment. Graphs show percentage of clonotypes expressed at a given frequency. CD4 and CD8 TCRs are restricted at month 3; by month 12, CD4 clonality has improved, whereas CD8 clonality remains restricted.

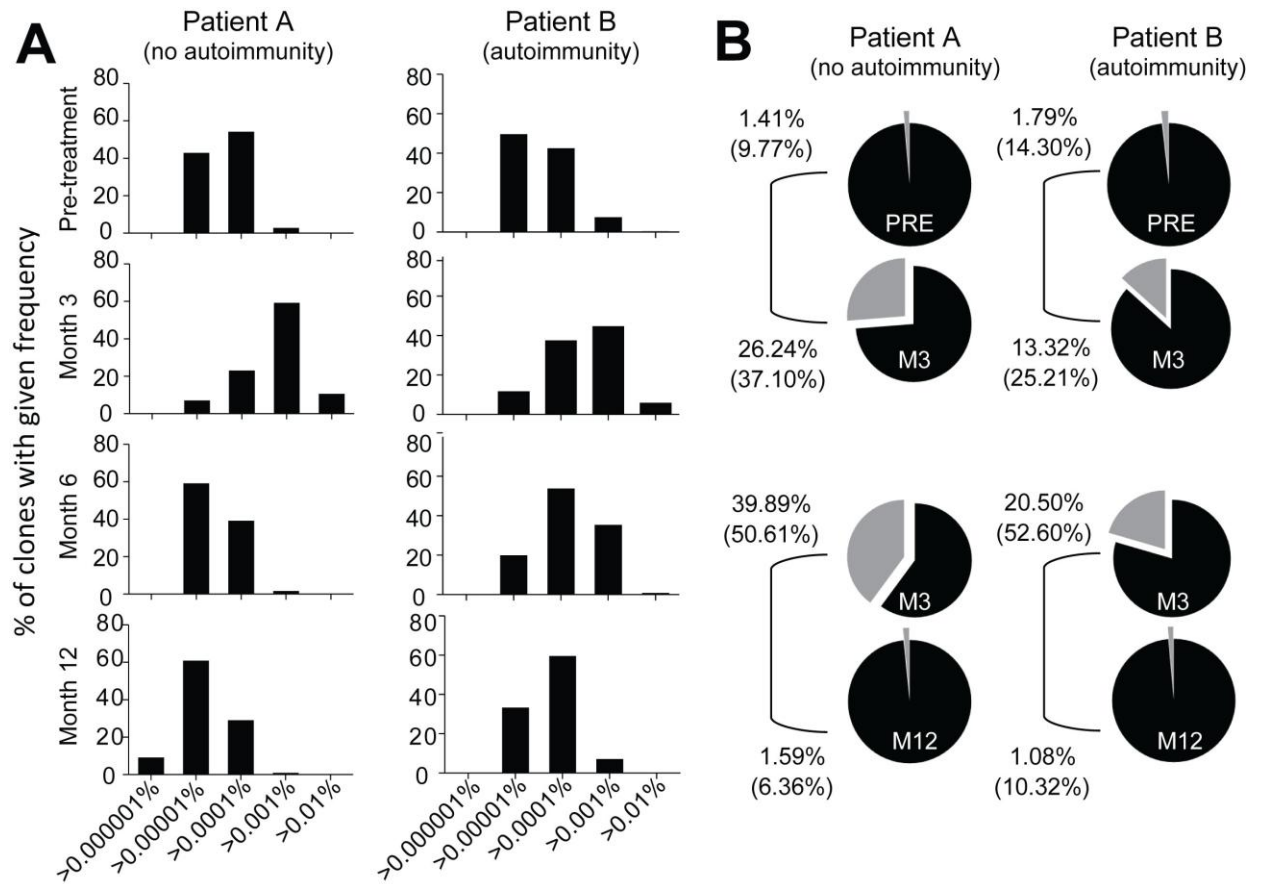

**Supplementary Figure 6 (A)** Distribution of clonal frequencies before and at 3, 6 and 12 months post-alemtuzumab for patient A (no autoimmunity) and patient B (autoimmunity). **(B)** Pre-treatment TCR sequences detectable after treatment - expressed as a percentage of total unique sequences (un-bracketed value) and total expressed sequences (bracketed value) for each time-point.

**A**

|                                          |            |            |             |             |
|------------------------------------------|------------|------------|-------------|-------------|
| Treatment Occasion                       | 1          | 2          | 3           | 4           |
| Number of patients                       | 86         | 86         | 39          | 7           |
| % Patients                               | 99         | 99         | 45          | 8           |
| Number of observations                   | 356        | 805        | 382         | 61          |
| Distribution of Observations per Patient |            |            |             |             |
| - Min                                    | 1          | 1          | 1           | 2           |
| - Inter-quartile Range                   | (3.0, 5.0) | (5.0, 9.0) | (5.5, 14.0) | (5.0, 12.5) |
| - Max                                    | 11         | 25         | 21          | 15          |
| - Mean                                   | 4.140      | 9.384      | 9.821       | 8.714       |

**B**

| Years since first treatment | % of all Patients |
|-----------------------------|-------------------|
| 0- <4 years                 | 15%               |
| 4 - <7 years                | 39%               |
| >7 years                    | 46%               |

**Supplementary Table 1 a)** Distribution of patients and observations by treatment occasion and **b)** length of follow up since first treatment, for patients included in kinetics of T-cell reconstitution studies.

| Follow-up period       | Treatment Occasion |               |                |                 | P-value |
|------------------------|--------------------|---------------|----------------|-----------------|---------|
|                        | 1                  | 2             | 3              | 4               |         |
| <b>first 18 months</b> |                    |               |                |                 |         |
| No. of Patients        | 85                 | 83            | 37             | 7               |         |
| mean rate of change    | 23.05              | 20.70         | 14.57          | 8.47            | < 0.001 |
| (95% CI)               | (20.08, 25.06)     | (17.7, 22.73) | (10.41, 17.76) | (-0.24, 16.22)  |         |
| <b>post 18 months</b>  |                    |               |                |                 |         |
| No. of Patients        | 3                  | 63            | 32             | 5               |         |
| mean rate of change    | 41.07              | 4.81          | 1.50           | 5.94            | 0.28    |
| (95% CI)               | (7.28, 82.79)      | (0.55, 17.01) | (-6.11, 17.04) | (-19.38, 39.18) |         |

**Supplementary Table 2.** CD4 T cell mean rate of ( $1 \times 10^6$  cells/litre/month) by treatment occasion after adjusting for age at first treatment. Individual patient data were summarised by estimating two rates of change over two observation periods i) up to 18 months, and ii) subsequent to 18 months. This was done using a piecewise linear regression model fitted separately for each treatment occasion. Raw data from 86 patients were used from every treatment occasion and observation period that met the minimum data requirements for this model: (i) two or more cell counts in an observation period, or (ii) at least one cell count in one observation period and two cell counts in the other observation period. Few patients were observed repeatedly for longer than 18 months during their first (only 3 patients) and fourth (only 5 patients) treatment occasions. Therefore, these periods contributed much less information on the rate of change post 18 months than the other treatment occasions. The p-value corresponds to a test of equality among the mean rates of change by treatment occasion.



| Follow-up period       | Treatment Occasion |                |                |                | P-value |
|------------------------|--------------------|----------------|----------------|----------------|---------|
|                        | 1                  | 2              | 3              | 4              |         |
| <b>first 18 months</b> |                    |                |                |                |         |
| No. of Patients        | 85                 | 83             | 37             | 7              |         |
| mean rate of change    | 16.23              | 11.91          | 7.07           | 3.14           | < 0.001 |
| (95% CI)               | (13.46, 17.99)     | (9.12, 13.69)  | (3.25, 9.89)   | (-4.79, 10.05) |         |
| <b>post 18 months</b>  |                    |                |                |                |         |
| No. of Patients        | 3                  | 63             | 32             | 5              |         |
| mean rate of change    | 34.88              | -1.49          | 1.10           | 1.39           | 0.12    |
| (95% CI)               | (0.4, 58.15)       | (-13.39, -0.8) | (-13.36, 4.35) | (-26.6, 18.8)  |         |

**Supplementary Table 3.** CD8 T cell mean rate of ( $1 \times 10^6$  cells/litre/month) by treatment occasion after adjusting for age at first treatment. Individual patient data were summarised by estimating two rates of change over two observation periods i) up to 18 months, and ii) subsequent to 18 months. This was done using a piecewise linear regression model fitted separately for each treatment occasion. Raw data from 86 patients were used from every treatment occasion and observation period that met the minimum data requirements for this model: (i) two or more cell counts in an observation period, or (ii) at least one cell count in one observation period and two cell counts in the other observation period. Few patients were observed repeatedly for longer than 18 months during their first (only 3 patients) and fourth (only 5 patients) treatment occasions. Therefore, these periods contributed much less information on the rate of change post 18 months than the other treatment occasions. The p-value corresponds to a test of equality among the mean rates of change by treatment occasion.

|                       | Autoimmune disease/<br>autoantibody | N  | Gender<br>(F:M) | Time since<br>last<br>treatment<br>(months) | Severity/Treatment                                                                                                                                                                                                                                                                                         |
|-----------------------|-------------------------------------|----|-----------------|---------------------------------------------|------------------------------------------------------------------------------------------------------------------------------------------------------------------------------------------------------------------------------------------------------------------------------------------------------------|
| Clinical<br>(40/87)   | Thyroid                             | 36 | 32:4            | 20 (IQR 13.5)                               | 2 patients required radioactive iodine<br><br>1 patient required thymectomy<br><br>All other patients responded to standard medical treatment.                                                                                                                                                             |
|                       | ITP                                 | 3  | 2:1             | 9 (IQR 1.5)                                 | Patient 1 (M): Immunoglobulin; rituximab and pulsed dexamethasone. Platelets stable $>100 \times 10^9 /L$ on mycophenolate.<br><br>Patient 2 (F): Immunoglobulin and oral steroids. Now off treatment, platelet count $>LLN$<br><br>Patient 3 (F): Oral steroids. Now off treatment, platelet count $>LLN$ |
|                       | Goodpasture's Syndrome              | 1  | 1:0             | 10 (IQR N/A)                                | Patient required renal dialysis and renal transplant. Creatinine currently within normal range.                                                                                                                                                                                                            |
| Antibodies<br>(17/87) | Anti-nuclear                        | 8  | 6:2             | 9.5 (IQR 7.5)                               | N/A - no clinical disease                                                                                                                                                                                                                                                                                  |
|                       | Anti-mitochondrial                  | 1  | 0:1             | 6 (IQR N/A)                                 |                                                                                                                                                                                                                                                                                                            |
|                       | Anti-smooth muscle                  | 2  | 2:0             | 20 (IQR 14)                                 |                                                                                                                                                                                                                                                                                                            |
|                       | Anti-TPO                            | 6  | 4:2             | 27 (IQR 16.5)                               |                                                                                                                                                                                                                                                                                                            |

**Supplementary Table 4.** Clinical details of secondary autoimmunity after alemtuzumab treatment of multiple sclerosis (total patients treated 87). IQR= interquartile range; LLN = lower limit of normal.; anti-TPO = anti-thyroid peroxidase.

**A. CD4**

|                       | Odds Ratio | 95% C.I      | P-value of effect |
|-----------------------|------------|--------------|-------------------|
| Tertile (Value range) |            |              | 0.13              |
| First (-12.2 to 18)   | 1          | -            |                   |
| Second (>18 to 28.8)  | 2.27       | (0.7, 7.98)  |                   |
| Third (>28.8 to 54.3) | 0.72       | (0.24, 2.12) |                   |

**B. CD8**

|                        | Odds Ratio | 95% C.I      | P-value of effect |
|------------------------|------------|--------------|-------------------|
| Tertile (Value range)  |            |              | 0.52              |
| First (-15.3 to 10.5)  | 1          | -            |                   |
| Second (>10.5 to 18.3) | 1.33       | (0.45, 4.01) |                   |
| Third (>18.3 to 66)    | 1.91       | (0.63,6)     |                   |

**Supplementary Table 5.** Rate of change in the first 18 months ( $1 \times 10^6$  cells/litre/month) does not predict autoimmunity after alemtuzumab. a) CD4 and b) CD8 rate of change was categorised into tertiles for use as a predictor. Strength of association was measured by the odds ratio, with rate of change in the second and third tertiles expressed in comparison to rate of change in the first tertile (reference category).

|                                    | HC                  | Pre                 | M1                 | M3                  | M6                  | M9                  | M12                 | >M12                | >M24                |
|------------------------------------|---------------------|---------------------|--------------------|---------------------|---------------------|---------------------|---------------------|---------------------|---------------------|
| <b>N</b>                           | 29                  | 17                  | 27                 | 27                  | 28                  | 21                  | 27                  | 23                  | 43                  |
| <b>Age at FACS<br/>(+/-95% CI)</b> | 34.55<br>(+/- 3.56) | 35.61<br>(+/- 4.23) | 38.19<br>(+/-3.45) | 35.59<br>(+/- 3.05) | 37.04<br>(+/- 3.18) | 36.05<br>(+/- 2.91) | 36.37<br>(+/- 2.95) | 37.78<br>(+/- 3.19) | 41.07<br>(+/- 2.62) |
| <b>Gender (F;M)</b>                | 19;10               | 13;4                | 19;8               | 18;9                | 16;12               | 15;6                | 17;10               | 16;7                | 27;16               |
| <b>Average N. of<br/>Cycles</b>    | NA                  | 0.00                | 2.11               | 2.26                | 2.25                | 2.24                | 2.19                | 2.26                | 2.28                |

**Supplementary Table 6.** Demographic details of patients included in cross-sectional phenotyping studies.

|          | <b>Primer Sequence</b>        |
|----------|-------------------------------|
| CD3-out5 | 5'-ACTGACATGGAACAGGGGAA-3'    |
| CD3-out3 | 5'-AGCTCTGAAGTAGGGAACATAT-3'  |
| CD3-in5  | 5'-GGCTATCATTCTTCTTCAAGGTA-3' |
| Sj-In5   | 5'-TGATGCCACATCCCTTTCAA-3'    |
| Sj-In3   | 5'-GTGCTGGCATCAGAGTGTGT-3'    |
| Sj-Out3  | 5'-ACACTTGCTCCGTGGTCTGT-3'    |
| Sj-Out5  | 5'-CTCTCCTATCTCTGCTCTGAA-3'   |
| CD3-in3  | 5'-TTCCTGGCCTATGCCCTTTT-3'    |
| Db1-Out  | 5'-CTCATCTGGGCCTGTCCTTGT-3'   |
| Db1-In   | 5'-TGACCCAGGAGGAAAGAAG-3'     |
| 1.1-Out  | 5'-AACCTAGGACCCTGTGGATG-3'    |
| 1.1-In   | 5'-TGCCTCCATCCTAGCCAGG-3'     |
| 1.2-Out  | 5'-CTCTCTATGCCTTCAATGTG-3'    |
| 1.2-In   | 5'-TCCGTACAGGGAAAAGTGG-3'     |
| 1.3-Out  | 5'-AAGGGAACACAGAGTACTGGAA-3'  |
| 1.3-In   | 5'-TCCCAACCTCTGCCTGAAT-3'     |
| 1.4-Out  | 5'-TGGACTTGGGGAGGCAGGA-3'     |
| 1.4-In   | 5'-AGGAGTGGGAAGGCAGCAGGT-3'   |
| 1.5-Out  | 5'-GAAACTGAGAACACAGCCAAGAA-3' |
| 1.5-In   | 5'-CTCATAAAATGTGGGTCAGTGG-3'  |
| 1.6-Out  | 5'-ATCCTCCCTTTATGTGCATGG-3'   |
| 1.6-In   | 5'-TGAATCCAGGCAGAGAAAGG-3'    |

**Supplementary Table 7** T cell receptor excision circle (TREC) primers

| <b>Probes</b> | <b>Sequences</b>                                   |
|---------------|----------------------------------------------------|
| CD3-P1        | 5'-GGCTGAAGGTTAGGGATACCAATATTCCTGTCTCfluro-3'      |
| CD3-P2        | 5'-(red 705)CTAGTGATGGGCTCTTCCCTTGAGCCCTTCp-3'     |
| Sj-P1         | 5'-AATAAGTTCAGCCCTCCATGTCACACTfluro-3'             |
| Sj-P2         | 5'-(red640)TGTTTTCCATCCTGGGGAGTGTTCp-3'            |
| Db1-P1        | 5'-CTGGGAGTTGGGACCGCCAGAGAGGTfluro-3'              |
| Db1-P2        | 5'-(red640)TTTGTAAGGTTTTCCCGTAGAGTTGAATCATTGTGp-3' |

**Supplementary Table 8** LightCycler Probe sequences

| <b>BV family</b> | <b>Primer Sequence</b>           | <b>Product Size<br/>(average bp)</b> |
|------------------|----------------------------------|--------------------------------------|
| BV2              | 5'-ATACCTGGCTCGTATGCTGGG-3'      | 443                                  |
| BV3              | 5'-CTCCTCTGCTGTGTGGTCTTCTG-3'    | 432                                  |
| BV4              | 5'-TGCTGTGCGGTTCTCTGTCTC-3'      | 430                                  |
| BV5              | 5'-CTGATCAAAACGAGAGGACAGCA-3'    | 356                                  |
| BV6              | 5'-TC(G/A)G(G/C)CTCCTGTGCTGTG-3' | 437                                  |
| BV7              | 5'-CAGGTGCTGGAGTCTCCCAG-3'       | 362                                  |
| BV7.2            | 5'-CAGGAGCTGGAGTCTCCCAG-3'       | 390                                  |
| BV7.3            | 5'-CAGATACTGGAGTCTCCCAG-3'       | 392                                  |
| BV9              | 5'-GCAGGCCCCAGTGGATTCTG-3'       | 398                                  |
| BV10             | 5'-TGTTCTTCTATGTGGCCCTTTGTC-3'   | 431                                  |
| BV11             | 5'-CGGCC(C/T)TCTGTCTCCTGG-3'     | 417                                  |
| BV12             | 5'-AGGTGACAGAGATGGGACAAGAAGT-3'  | 359                                  |
| BV13             | 5'-CTGCCTGACTCTGCCTGGAAC-3'      | 459                                  |
| BV14             | 5'-TGTCTCCTGGGAGCAAAGCA-3'       | 414                                  |
| BV15             | 5'-TGGCCCTTTGTCTCCTTGG-3'        | 419                                  |
| BV18             | 5'-TCTTCTGGGGGCAGGTCTCT-3'       | 412                                  |
| BV19             | 5'-GGTGCTCTGCTGTGTGGTCC-3'       | 435                                  |
| BV20             | 5'-CTGCTGCTTCTGCTGCTTCTG-3'      | 435                                  |
| BV24             | 5'-CCTGGGAACAGGGTCCATG-3'        | 407                                  |
| BV25             | 5'-GGCTCCTCTGCTACATGGGC-3'       | 434                                  |
| BV27             | 5'-TGGTCCTTTGCCTTCTAGGAGC-3'     | 419                                  |
| BV28             | 5'-CCTGGCTGTAGGCCTCGTAGA-3'      | 406                                  |
| BV29             | 5'-GGACTAGGCTCTGTGTTCAAGTCT-3'   | 408                                  |
| BV30             | 5'-CTCTGCTCTCTCCTTGCCCTTC-3'     | 432                                  |
| BC               | 5'-CTCAAACACAGCGACCTCGG-3'       |                                      |

**Supplementary Table 9** Primer panel of the amplification TCRBV
